# Supplementary material
Source: PubMed Central journal article supplement (PMC5937850)

Figure Supplemental S1:

Representative gating strategy for flow cytometric analysis.

Splenocytes were stained with B220-PerCP x IgMa-PE (Tg+) x IgMb-FITC (endogenous)

Tg+ (B6xNZB)F1

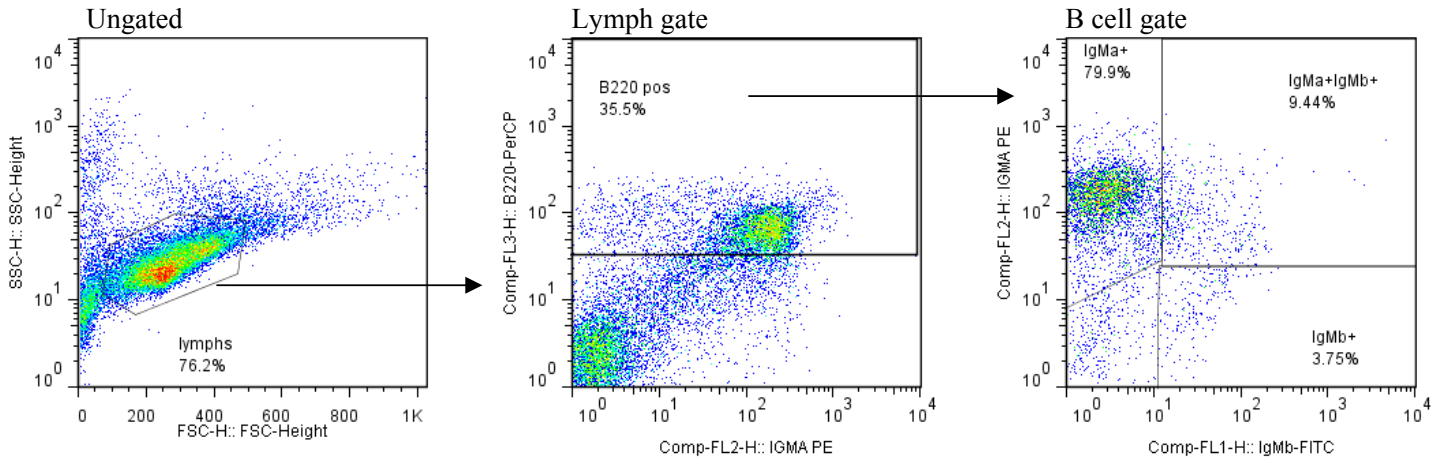

Non-Tg (B6xNZB)F1

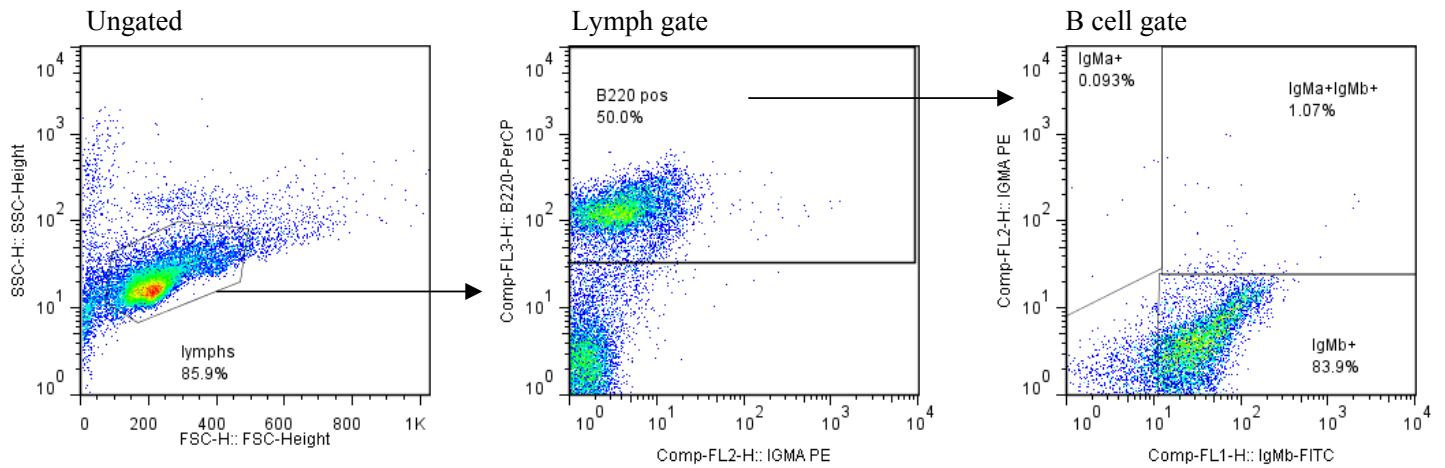

Supplement: NIHMS949508-supplement-Supporting_Information_Figure_S1.pdf [file NIHMS949508-supplement-Supporting_Information_Figure_S1.pdf]
